# Supplementary material for: Measured Canadian oil sands CO2 emissions are higher than estimates made using internationally recommended methods
Source: PubMed Central journal article supplement (PMC6478833; doi:10.1038/s41467-019-09714-9), 2019-04-23
Supplement: 41467_2019_9714_MOESM2_ESM.pdf [file 41467_2019_9714_MOESM2_ESM.pdf]

## Reporting Summary

Nature Research wishes to improve the reproducibility of the work that we publish. This form provides structure for consistency and transparency in reporting. For further information on Nature Research policies, see [Authors & Referees](#) and the [Editorial Policy Checklist](#).

### Statistics

For all statistical analyses, confirm that the following items are present in the figure legend, table legend, main text, or Methods section.

n/a Confirmed

- |                                     |                                     |                                                                                                                                                                                                                                                            |
|-------------------------------------|-------------------------------------|------------------------------------------------------------------------------------------------------------------------------------------------------------------------------------------------------------------------------------------------------------|
| <input type="checkbox"/>            | <input checked="" type="checkbox"/> | The exact sample size ( $n$ ) for each experimental group/condition, given as a discrete number and unit of measurement                                                                                                                                    |
| <input checked="" type="checkbox"/> | <input type="checkbox"/>            | A statement on whether measurements were taken from distinct samples or whether the same sample was measured repeatedly                                                                                                                                    |
| <input type="checkbox"/>            | <input checked="" type="checkbox"/> | The statistical test(s) used AND whether they are one- or two-sided<br><i>Only common tests should be described solely by name; describe more complex techniques in the Methods section.</i>                                                               |
| <input checked="" type="checkbox"/> | <input type="checkbox"/>            | A description of all covariates tested                                                                                                                                                                                                                     |
| <input type="checkbox"/>            | <input checked="" type="checkbox"/> | A description of any assumptions or corrections, such as tests of normality and adjustment for multiple comparisons                                                                                                                                        |
| <input type="checkbox"/>            | <input checked="" type="checkbox"/> | A full description of the statistical parameters including central tendency (e.g. means) or other basic estimates (e.g. regression coefficient) AND variation (e.g. standard deviation) or associated estimates of uncertainty (e.g. confidence intervals) |
| <input type="checkbox"/>            | <input checked="" type="checkbox"/> | For null hypothesis testing, the test statistic (e.g. $F$ , $t$ , $r$ ) with confidence intervals, effect sizes, degrees of freedom and $P$ value noted<br><i>Give <math>P</math> values as exact values whenever suitable.</i>                            |
| <input checked="" type="checkbox"/> | <input type="checkbox"/>            | For Bayesian analysis, information on the choice of priors and Markov chain Monte Carlo settings                                                                                                                                                           |
| <input checked="" type="checkbox"/> | <input type="checkbox"/>            | For hierarchical and complex designs, identification of the appropriate level for tests and full reporting of outcomes                                                                                                                                     |
| <input checked="" type="checkbox"/> | <input type="checkbox"/>            | Estimates of effect sizes (e.g. Cohen's $d$ , Pearson's $r$ ), indicating how they were calculated                                                                                                                                                         |

*Our web collection on [statistics for biologists](#) contains articles on many of the points above.*

### Software and code

Policy information about [availability of computer code](#)

Data collection

All data was collected with several different commercially available atmospheric pollutant measuring instruments, each with their own proprietary source code and software.

Data analysis

Data analysis was performed with IGOR Pro Version 6.0 (Wavemetrics Inc), with code for emissions estimation from aircraft data written in IGOR Pro 6.0. The source code for the TERRA algorithm written with IGOR Pro is provided in a Supplementary File.

For manuscripts utilizing custom algorithms or software that are central to the research but not yet described in published literature, software must be made available to editors/reviewers. We strongly encourage code deposition in a community repository (e.g. GitHub). See the Nature Research [guidelines for submitting code & software](#) for further information.

### Data

Policy information about [availability of data](#)

All manuscripts must include a [data availability statement](#). This statement should provide the following information, where applicable:

- Accession codes, unique identifiers, or web links for publicly available datasets
- A list of figures that have associated raw data
- A description of any restrictions on data availability

All data used in this publication are freely available on the Canada-Alberta Oil Sands Environmental Monitoring Information Portal: <http://donnees.ec.gc.ca/data/air/monitor/ambient-air-quality-oil-sands-region/pollutant-transformation-summer-2013-aircraft-intensive-multi-parameters-oil-sands-region/?lang=en> The source data underlying Figs 1-4, Supplementary figures 2d, 3b, 4b, 4c and Tables 1 and 2 are provided as a Source Data file.

## Field-specific reporting

Please select the one below that is the best fit for your research. If you are not sure, read the appropriate sections before making your selection.

Life sciences     Behavioural & social sciences     Ecological, evolutionary & environmental sciences

For a reference copy of the document with all sections, see [nature.com/documents/nr-reporting-summary-flat.pdf](https://www.nature.com/documents/nr-reporting-summary-flat.pdf)

## Ecological, evolutionary & environmental sciences study design

All studies must disclose on these points even when the disclosure is negative.

|                                   |                                                                                                                                                                                                                                                                                                                                                              |
|-----------------------------------|--------------------------------------------------------------------------------------------------------------------------------------------------------------------------------------------------------------------------------------------------------------------------------------------------------------------------------------------------------------|
| Study description                 | Measurements of Carbon dioxide (CO <sub>2</sub> ) in the oil Sands region of Canada, using an aircraft platform. Data are used to derive emissions for specific oil sands facilities and the overall emissions for the oil sands in general.                                                                                                                 |
| Research sample                   | The sample in this case is simply the air surrounding the oil sands, which contains CO <sub>2</sub> .                                                                                                                                                                                                                                                        |
| Sampling strategy                 | Sample size (ie: number of flights and length of flights) was determined based primarily on the amount of fuel in the aircraft required to fly a full box around a given industrial facility, and the number of flight hours allotted for the project overall.                                                                                               |
| Data collection                   | Measurements of CO <sub>2</sub> were made aboard the aircraft with a commercial Picarro CRD instrument, with 2 second time resolution for the duration of a given flight.                                                                                                                                                                                    |
| Timing and spatial scale          | Measurements were made on various days during the months of august and September, 2013. Each flight was conducted for approximately 2-5 hours depending on the length of time required to completely encircle a given facility. Each box shaped flight covered an area of approximately 20km x 20km depending upon the size of the given oil sands facility. |
| Data exclusions                   | Data were excluded when the measured wind direction or wind speed during flight were not conducive to the estimation of total emissions from a facility, or when emissions from neighboring facilities unduly influenced the emissions data from the facility being studied. These cases were assessed after the study and during analysis of data.          |
| Reproducibility                   | Between 3 and 6 flights around each facility were conducted, to optimally make use of the prescribed number of flight hours.                                                                                                                                                                                                                                 |
| Randomization                     | Flights around each facility were generally conducted when the meteorology was suitable for the experiment, and were not randomized intentionally.                                                                                                                                                                                                           |
| Blinding                          | This is not relevant for this study as it is an aircraft campaign where all industries being investigated are known.                                                                                                                                                                                                                                         |
| Did the study involve field work? | <input checked="" type="checkbox"/> Yes <input type="checkbox"/> No                                                                                                                                                                                                                                                                                          |

## Field work, collection and transport

|                          |                                                                                                            |
|--------------------------|------------------------------------------------------------------------------------------------------------|
| Field conditions         | Aircraft data was collected on rain free days, with favorable meteorology, and minimal clouds.             |
| Location                 | Oil sands region north of Fort McMurray, Alberta, Canada, covering an area of approximately 60 km x 80 km. |
| Access and import/export | not relevant for this study                                                                                |
| Disturbance              | not relevant for this study                                                                                |

## Reporting for specific materials, systems and methods

We require information from authors about some types of materials, experimental systems and methods used in many studies. Here, indicate whether each material, system or method listed is relevant to your study. If you are not sure if a list item applies to your research, read the appropriate section before selecting a response.

## Materials & experimental systems

| n/a                                 | Included in the study                                |
|-------------------------------------|------------------------------------------------------|
| <input checked="" type="checkbox"/> | <input type="checkbox"/> Antibodies                  |
| <input checked="" type="checkbox"/> | <input type="checkbox"/> Eukaryotic cell lines       |
| <input checked="" type="checkbox"/> | <input type="checkbox"/> Palaeontology               |
| <input checked="" type="checkbox"/> | <input type="checkbox"/> Animals and other organisms |
| <input checked="" type="checkbox"/> | <input type="checkbox"/> Human research participants |
| <input checked="" type="checkbox"/> | <input type="checkbox"/> Clinical data               |

## Methods

| n/a                                 | Included in the study                           |
|-------------------------------------|-------------------------------------------------|
| <input checked="" type="checkbox"/> | <input type="checkbox"/> ChIP-seq               |
| <input checked="" type="checkbox"/> | <input type="checkbox"/> Flow cytometry         |
| <input checked="" type="checkbox"/> | <input type="checkbox"/> MRI-based neuroimaging |
